## RESEARCH ARTICLE

# Behavioral and postural analyses establish sleep-like states for mosquitoes that can impact host landing and blood feeding

Oluwaseun M. Ajayi<sup>1,\*</sup>, Justin M. Marلمان<sup>1</sup>, Lucas A. Gleitz<sup>1</sup>, Evan S. Smith<sup>1</sup>, Benjamin D. Piller<sup>1</sup>, Justyna A. Krupa<sup>1</sup>, Clément Vinauger<sup>2</sup> and Joshua B. Benoit<sup>1,\*</sup>

## ABSTRACT

Sleep is an evolutionarily conserved process that has been described in different animal systems. For insects, sleep characterization has been primarily achieved using behavioral and electrophysiological correlates in a few systems. Sleep in mosquitoes, which are important vectors of disease-causing pathogens, has not been directly examined. This is surprising as circadian rhythms, which have been well studied in mosquitoes, influence sleep in other systems. In this study, we characterized sleep in mosquitoes using body posture analysis and behavioral correlates, and quantified the effect of sleep deprivation on sleep rebound, host landing and blood-feeding propensity. Body and appendage position metrics revealed a clear distinction between the posture of mosquitoes in their putative sleep and awake states for multiple species, which correlated with a reduction in responsiveness to host cues. Sleep assessment informed by these posture analyses indicated significantly more sleep during periods of low activity. Night-time and daytime sleep deprivation resulting from the delivery of vibration stimuli induced sleep rebound in the subsequent phase in day and night active mosquitoes, respectively. Lastly, sleep deprivation suppressed host landing in both laboratory and field settings, and impaired blood feeding of a human host when mosquitoes would normally be active. These results suggest that quantifiable sleep states occur in mosquitoes and highlight the potential epidemiological importance of mosquito sleep.

**KEY WORDS:** Sleep, Sleep deprivation, Mosquito, Vectorial competence, Pathogen transmission

## INTRODUCTION

Sleep is a phenomenon universally observed across the animal kingdom with notable description in cnidarians (Nath et al., 2017), nematodes (Raizen et al., 2008), arthropods (Helfrich-Förster, 2018; Tobler, 1983) and mammals (Campbell and Tobler, 1984). During sleep, animals lose connection with their external environment, as a result of attenuated sensory processing and motor outputs, which poses a significant predation risks to the individuals (Kashiwagi and Hayashi, 2020). While sleeping, individuals cannot search for food resources, engage in parental care or evade detrimental situations, which indicates that sleep is of essential benefit when considering its trade-offs (Helfrich-Förster, 2018). In vertebrates (particularly

mammals), acute sleep deprivation results in impaired cognition (Drummond et al., 2000; Harrison and Horne, 1999), while chronic sleep deprivation has been implicated in hallucinations, speech delay and sometimes death (Rechtschaffen and Bergmann, 2002; Waters et al., 2018). Similarly, the importance of sleep has been established in invertebrates, especially in insects. Studies have shown that sleep deprivation significantly reduces the precision of waggle dance signaling in honey bees (*Apis mellifera*) (Klein et al., 2010), and results in short- and long-term memory defects, along with a multitude of other factors, in fruit flies (*Drosophila melanogaster*) (Seugnet et al., 2008, 2011).

Parameters underlying sleep can be evaluated using different approaches (Campbell and Tobler, 1984); the two classical and robust hallmarks of sleep-like states in a variety of animals are behavioral and electrophysiological correlates (Deboer, 2013; Keene and Duboue, 2018). Modulations in brain wave activity, which is measured using electroencephalography in mammals or recordings of local field potentials in invertebrates, can establish specific electrophysiological correlates of sleep (Keenan and Hirshkowitz, 2010; van Alphen et al., 2013). Behaviorally, sleep can be characterized using the following features: (i) species-specific postures, (ii) reversible prolonged quiescence in certain periods in the circadian cycle, (iii) increased arousal threshold or decreased response to stimuli, and (iv) rebound or recovery sleep in response to sleep deprivation (Keene and Duboue, 2018). For many animal systems, the establishment of behavioral factors is sufficient to characterize the sleep-like state.

Despite the characterization of sleep in insect systems, including fruit flies (Hendricks et al., 2000; Shaw et al., 2000), cockroaches (Tobler, 1983), bees (Kaiser, 1988, 1995) and wasps (Linsley and Gorton Linsley, 1962), and the likely benefits of sleep (Prather et al., 2015; Schmidt, 2014; Xie et al., 2013), little is known about sleep in blood-feeding arthropods. There has been limited focus on sleep in mosquitoes, unlike established roles of circadian rhythms (which are linked to or influence sleep in many animals) on mosquito biology (Leming et al., 2014; Rund et al., 2011, 2016). The entirety of sleep-based research in mosquitoes may be restricted to only two studies: an early study on the resting postures of *Aedes aegypti* (Haufe, 1963), but this study did not consider these resting postures as sleep-like states, and our recent review, which provides lines of evidence for sleep-like conditions in mosquitoes, including the potential of unique postural differences between sleep-like and awake states in a single mosquito, *Ae. aegypti* (Ajayi et al., 2020).

In this study, we provide the characterization of sleep-like states in mosquitoes based on behavioral features established in other systems and show the effect of sleep deprivation on epidemiologically relevant aspects of mosquito biology: their locomotor activity, host landing and blood-feeding propensity. Our results indicate that sleep-like states occur in mosquitoes with quantifiable postural metrics which correlate with increased arousal

<sup>1</sup>Department of Biological Sciences, University of Cincinnati, Cincinnati, OH 45221, USA. <sup>2</sup>Department of Biochemistry, Virginia Polytechnic Institute and State University, Blacksburg, VA 24061, USA.

\*Authors for correspondence (ajayiom@mail.uc.edu; joshua.benoit@uc.edu)

ORCID iD: O.M.A., 0000-0002-9211-9898; J.B.B., 0000-0002-4018-3513

threshold, and that mosquito sleep deprivation induces subsequent sleep rebound and impairs host landing and blood feeding during normally active periods. This first extensive evaluation in mosquitoes represents an ideal model for understanding the importance of sleep in blood-feeding arthropods.

## MATERIALS AND METHODS

### Mosquito husbandry

Three mosquito species were used: *Aedes aegypti*, *Culex pipiens* and *Anopheles stephensi*. *Culex pipiens* colonies used for this study were originally collected in 2015 from Columbus, OH, and supplemented with field-collected individuals every 2–3 years (Buckeye strain), while those of *Ae. aegypti* and *An. stephensi* were acquired from Benzon Research (Carlisle, PA, USA) and BEI Resources (*Ae. aegypti*, Rockefeller strain, MR4-735; *An. stephensi*) for postural analysis. Mosquito colonies were maintained in the laboratory at the University of Cincinnati at 25°C, 80% relative humidity (RH) under a 15 h:9 h light:dark (L/D) cycle with access to water and 10% sucrose *ad libitum* and at Virginia Tech under the same conditions for the postural analysis. Mosquito eggs were produced from 4- to 5-week-old females through artificial feeding (Hemotek, Blackburn, UK) with chicken or rabbit blood (Pel-Freez Biologicals, Rogers, AZ, USA). Upon egg hatching, larvae were separated into 18×25×5 cm containers (at a density of 250 individuals per container) and were fed finely ground fish food (Tetramin, Melle, Germany). For the experiments, pupae were collected and maintained in an incubator at 24°C, 70–75% RH, under a 12 h:12 h L/D cycle until adult emergence. Adult mosquitoes that emerged were provided with access to water and 10% sucrose *ad libitum*. Unless otherwise stated, all adult female mosquitoes used for the laboratory-based experiments were aged 5–8 days post-ecdysis. However, adult female mosquitoes (12–17 days old) were collected directly from the maintained laboratory colonies for the field-based experiments. As the experimenters represent potential blood host to the mosquitoes, in all experiments, studies were conducted in isolated rooms and incubators to eliminate potential disturbances from the experimenter or other factors. Remote computer access and automated data collection were used to prevent exposure to host-based factors.

### Posture analysis

#### Quantification of postural changes associated with prolonged immobility

To quantify body postures associated with putative sleep states, groups of twenty 5- to 7-day-old adult females of *Ae. aegypti*, *Cx. pipiens* and *An. stephensi* were enclosed within acrylic containers (16 Oz mosquito breeder; BioQuip, Rancho Dominguez, CA, USA) covered by a fabric mesh at the top. Containers were positioned within the field of view of an infrared camera (PointGrey Firefly MV FMVU-03MTC, FLIR, Wilsonville, OR, USA) connected to a computer. After the experimenter left the room, mosquitoes were left unperturbed for 2 h to allow acclimation to the experimental environment. Then, the experimenter remote-accessed the computer, and pictures of individual mosquitoes were taken during a 1 h window. Only mosquitoes that landed perpendicular to the focal plane of the camera, with their legs clearly visible were conserved for the analysis (*Ae. aegypti*;  $n=22$ ; *Cx. pipiens*;  $n=41$ ; *An. stephensi*;  $n=17$ ). All experiments were conducted on sugar-fed but never blood-fed females during the last 2 h of the photophase. Depending on whether the focal mosquito was seen moving its appendages (e.g. grooming, moving of the legs), it was either classified as ‘active’ or ‘at rest’. Saved images were imported in

ImageJ (National Institutes of Health, USA) where the hind leg angle relative to the mosquito’s main body axis, the body angle relative to the substrate, the elevation of the hind leg relative to the substrate and the elevation of the thorax relative to the substrate were measured. All length measurements (in pixels) were normalized to the length of the mosquito’s body, from tip of the abdomen to the top of the thorax. Repeated measurements of the same image showed a tracking error of 2.41 pixels for lengths, which represents a fraction of the thickness of the hind legs, and an error of 0.61 deg for angles. A principal component analysis (PCA) was conducted in R version 3.6.3 (<https://www.r-project.org/>) and ANOSIM (package *vegan* version 2.5-6; <https://rdrr.io/rforge/vegan/man/anosim.html>) was used to test for the dissimilarity between species, as well as between ‘active’ and ‘at rest’ mosquitoes.

### Time course analysis of body postures

Adult females of each species were individualized in plastic *Drosophila* tubes (25×95 mm, Genesee Scientific, San Diego, CA, USA) and, for each replicate ( $n=3$ ), 20 tubes of females of the same species were positioned horizontally, in the field of view of a video camera (C920, Logitech, Lausanne, Switzerland). Every 10 min for the last 3 h of the photophase and for the first 3 h of the scotophase, the posture of each individual was recorded and classified as ‘active’ or ‘at rest’ based on the angle of the hind legs relative to the main body axis. Analysis of the data was performed in R.

### Basic rest-activity rhythms

The rest-activity rhythms of the three mosquito species were quantified using a Locomotor Activity Monitor 25 (LAM25) system (TriKinetics Inc., Waltham, MA, USA) and the DAMSystem3 Data Collection Software (TriKinetics). Originally, these systems were developed for *Drosophila* but recently have been utilized to measure the activity levels of several blood-feeding arthropods, including mosquitoes (Lima-Camara et al., 2014; Rosendale et al., 2019; Rund et al., 2012). Individual mosquitoes were placed in 25×150 mm clear glass tubes with access to water and 10% sucrose provided *ad libitum*. These tubes were placed horizontally in the LAM25 system which allows the simultaneous recording of 32 mosquitoes in an ‘8×4’ horizontal by vertical matrix during a single trial. The entire set-up was held in a light-proof low-temperature incubator supplied with its own lighting system at 24°C, 70–75% RH, under a 11 h:11 h L/D cycle (with 1 h dawn and 1 h dusk transitions). After the acclimation of the mosquitoes for 2 days, activity level was recorded as the number of times (in a minute) a mosquito crosses an infrared beam of the LAM25 in the middle of the locomotor tube. Data collected with the DAMSystem3 for 5 days (with the removal of mosquitoes that were not alive until the end of the assay) were analyzed using the Rethomics platform in R with its associated packages such as *behavr*, *ggetho*, *damr* and *sleepr* (Geissmann et al., 2019).

### Sleep deprivation assay

Following the acclimation of the mosquitoes for 2 days and the establishment of a 24 h baseline day in the LAM25 system, sleep deprivation was conducted in the specific phase of interest. Sleep deprivation was achieved in the mosquitoes through the delivery of vibration stimuli (vibration amplitude=3 G) using a Multi-Tube Vortex Mixer (Ohaus, Parsippany, NJ, USA) attached to the LAM25 system. The vibration amplitude used in our study represents half of the vibration amplitude required to arouse all individuals in an earlier *Drosophila*-based study (Shaw et al., 2000).

In the diurnal *Ae. aegypti* mosquitoes, three different sleep deprivation protocols were conducted based on modifications from another *Drosophila*-based study (Kayser et al., 2015): 12 h night-time deprivation (12NTD), 4 h night-time deprivation (4NTD) and 12 h daytime deprivation (DTD). Whereas in the nocturnal *An. stephensi* mosquitoes, only DTD was conducted. To accomplish 12NTD, a sequence of vibration pulses lasting 1 min, followed by 5 min of rest between pulses was programmed for the entire scotophase subsequent to the baseline day (see Fig. S1A). In 4NTD, vibration pulses lasted for 1 min followed by 1 min of rest between pulses in the first 4 h of the night (Zeitgeber time ZT12–ZT16) following the baseline day. This was done in such a way that the total number of vibration pulses obtainable in 12NTD was delivered in a short time frame (see Fig. S1B). DTD in *Ae. aegypti* and *An. stephensi* was conducted similarly to 12NTD, the only difference is that DTD was accomplished during the photophase that succeeds the baseline day (see Fig. S1C,D).

To calculate sleep loss, we used the mean difference of the sleep amounts in the scotophase (12NTD and 4NTD) or photophase (DTD) preceding the deprivation and that of the scotophase (12NTD and 4NTD) or photophase (DTD) during the deprivation. For the calculation of sleep gain, we used the mean difference of the sleep amounts in the photophase (12NTD and 4NTD) or scotophase (DTD) after the deprivation and that of the photophase (12NTD and 4NTD) or scotophase (DTD) before the deprivation.

### Host landing and blood feeding assays

Host landing 4 h post sleep deprivation (PSD) was assessed in *Ae. aegypti* mosquitoes both in laboratory and field conditions. In the lab-based study, sleep deprivation protocol was similar to 12NTD (described under ‘Sleep deprivation assay’). The only difference was that a 17.5×17.5×17.5 cm knitted mesh-nylon cage (BioQuip) housing mosquitoes (10 per replicate) was attached to the Multi-Tube Vortex Mixer to achieve sleep loss, with the entire set-up held in a room isolated from host cues (26±1°C, 75±5% RH and 12 h:12 h L/D cycle).

In the field-based experiment, adult female mosquitoes were released into similar cages described earlier (10 mosquitoes per replicate), which were then placed into 47.5×47.5×47.5 cm knitted mesh-nylon cages (BioQuip). To achieve bulk sleep deprivation, the entire set-up was situated in a city environment, where high activity occurs and located near an air conditioning unit. This air conditioning unit was operating periodically over 24 h, but mainly in the scotophase, likely providing disturbance both through vibration and sound to prevent sleep. The control set-up was placed in a similar environment to the sleep-deprived counterpart, but located in a secluded area of the property where mosquitoes experienced reduced disturbances. Both locations were covered to allow the mosquitoes to remain in shaded areas. This experiment was conducted independently three times, which yielded similar differences. The presence of potential hosts within range of detection was likely much higher in the location with increased likelihood of disturbance. To determine the number of mosquitoes that landed on a host mimic, we used techniques adapted from previous studies (Barnard et al., 2011; Hagan et al., 2018). A host mimic (Hemotek feeder) filled with a mixture of water and 100 µl artificial eccrine perspiration (Pickering Laboratories, Mountain View, CA, USA) heated to 37°C was covered three times with parafilm and placed on top of the experimental cage. Incidental contact was distinguished from foraging contact by using mosquitoes that landed and remained for at least 5 s on the feeder.

By recording using a video camera (7 White, GoPro, San Mateo, CA, USA), the number of mosquitoes that made foraging contact was counted in the lab experiment at 10, 20, 40 and 60 min after the artificial host was turned on. In the field experiment, this was counted only after 5, 10 and 15 min. Results were expressed as a proportion of the total mosquitoes that remained alive at the end of the experiment and compared with the control group.

To assess the influence of sleep deprivation on blood-feeding propensity in mosquitoes, Adult female *Ae. aegypti* were exposed to the legs of a volunteer human host for 5 min after 4 h PSD (approved by the University of Cincinnati IRB 2021-0971). The set-up and sleep deprivation protocol in this experiment were similar to the lab-based host landing assay described above. The number of mosquitoes that successfully blood fed (shown by engorged abdomen) in the sleep-deprived group was compared with that of control (non-sleep deprived group) and expressed as a proportion of the total mosquitoes that stayed alive throughout the assay.

### Reduction in host responsiveness

To determine whether prolonged sleep-like states reduced the response of mosquitoes, we performed basic host cue response studies on two species (*Ae. aegypti* and *Cx. pipiens*). Mosquitoes were observed through video and after 0, 30, 60, 120 and 240 min of inactivity, the experimenter entered the room and exhaled on the cage to provide a host cue. The number of mosquitoes that took flight within 30 s following exposure to experimenter breath was used as a proxy for host response. Each time point was conducted on 8–14 mosquitoes for each species.

### Quantification and statistical analysis

Experimental replicates utilized for the study are distinct samples and biologically independent. Sample sizes for the different experiments are mentioned in the methods or in the associated figure legend. Statistical tests and significance between groups are detailed within each figure and/or in the figure legend. All analyses were done in R v. 3.6.3.

## RESULTS

### Distinct postural differences exist between putative sleep-like and active (awake) states in multiple mosquito species

Sleep states induce a behavioral quiescence typically associated with an animal-specific stereotypical posture (Eban-Rothschild and Bloch, 2008; Raccuglia et al., 2019; Ramón et al., 2004; van Alphen et al., 2021). In *Ae. aegypti*, we previously showed that prolonged immobilization was associated with a prostrate state where the hind legs are lowered, and the thorax and abdomen brought closer to the substrate (Haufe, 1963). Here, we examined whether different postural states occur across mosquito species and whether these states are correlated with prolonged periods of inactivity. We video recorded adult *Ae. aegypti*, *Cx. pipiens* and *An. stephensi* females in groups of 20 females within acrylic containers whose top was covered by a fabric mesh. After an acclimatization period of 2 h to reduce the impact of previous host manipulation, pictures were taken from outside the experimental room by remote accessing the computer controlling the camera (Fig. 1A). Principal component analysis (PCA) of the hind leg angle relative to the mosquito’s main body axis, the body angle relative to the substrate, the elevation of the hind leg relative to the substrate and the elevation of the thorax relative to the substrate, revealed a clear clustering of each species’ body posture (ANOSIM:  $R=0.204$ ,  $P<0.001$ ) and a distinct clustering of postures associated with mosquitoes in prolonged immobilization (>30 min) (ANOSIM:  $R=0.824$ ,  $P<0.001$ )

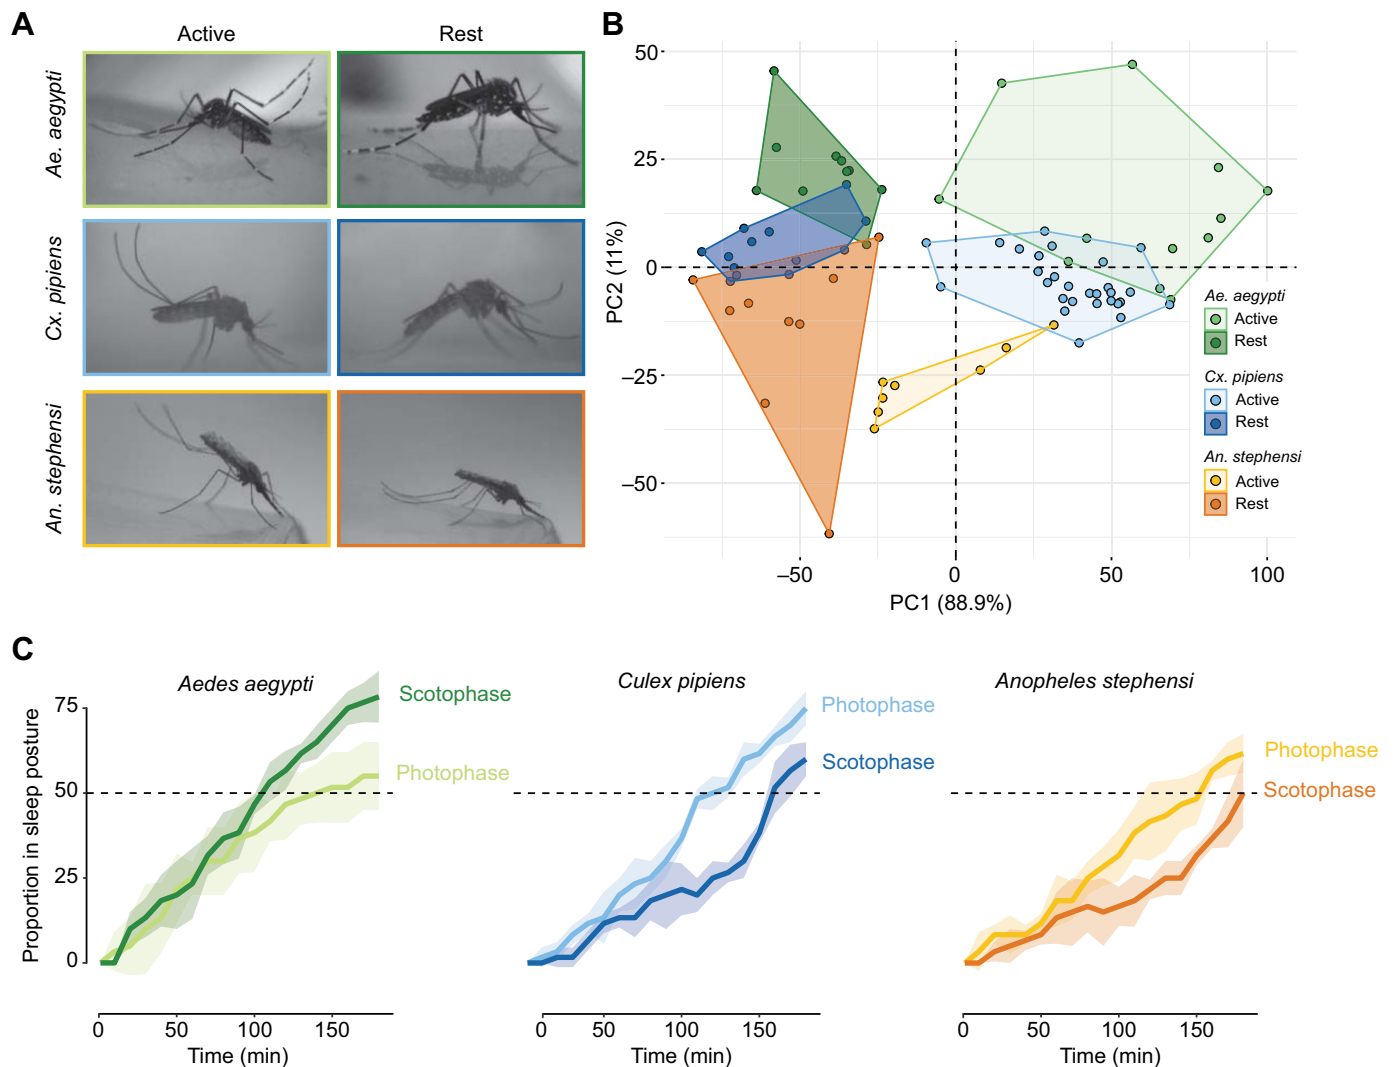

**Fig. 1. Prolonged inactivity is associated with stereotypical body postures in multiple mosquito species.** (A) Representative pictures of adult female *Aedes aegypti* (top row), *Culex pipiens* (middle row) and *Anopheles stephensi* (bottom row) either in active state (left column) or at rest (right column). (B) Principal component analysis of the ensemble of postural measures. The colors of points and grouping contours indicate the species and status of each point: Green: *Ae. aegypti* ( $n=22$ ); blue: *Cx. pipiens* ( $n=41$ ); orange: *An. stephensi* ( $n=17$ ). Darker colors indicate rest and lighter colors indicate active states. (C) Proportion of mosquitoes displaying a sleep posture as a function of time for each species ( $n=3$  replicates, 20 mosquitoes per species for each time;  $N=120$  individuals for each species). Proportions were quantified either during the photophase (lighter colors) or during the scotophase (darker colors). Shaded regions indicate the standard deviation.

(Fig. 1B). Interestingly, the analysis of similarity's  $R$  statistics, which compares the mean of ranked dissimilarities between groups to the mean of ranked dissimilarities within groups, revealed a stronger dissimilarity between sleep/activity states than between mosquito species ( $R=0.824$  and  $0.204$ , respectively). Analysis of the contribution of each variable to the principal components (PCs) revealed that the hind leg angle contributed to 99.4% of the variance explained by PC1 (88.9%), and the body angle contributed to 99.3% of the variance explained by PC2 (11%). In other words, while the body angle seems mostly driven by interspecific differences, the position of the hind legs appears as a reliable indicator of prolonged rest states.

In a second postural assay, adult females of *Ae. aegypti*, *Cx. pipiens* and *An. stephensi* were individualized in plastic *Drosophila* tubes and, for each assay, 20 tubes of females of the same species were positioned horizontally, in the field of view of a video camera. Every 10 min, the posture of each individual was recorded and classified as 'active' or 'rest' based on the angle of the hind legs

relative to the main body axis. For all three species, regardless of whether the experiment was conducted during the last 3 h of the photophase, or during the first 3 h of the scotophase (to capture the activity peaks of both nocturnal and diurnal species), the proportion of mosquitoes in a sleep-like posture was strongly correlated with the amount of time spent in the absence of external stimulation (Fig. 1C; *Ae. aegypti* photophase: Pearson correlation coefficient  $r=0.907$ ; scotophase:  $r=0.978$ ; *Cx. pipiens* photophase:  $r=0.983$ ; scotophase:  $r=0.929$ ; *An. stephensi* photophase:  $r=0.959$ ; scotophase:  $r=0.906$ ;  $n=30$  each). Although a log-rank test revealed no significant differences between scotophase and photophase sleep curves, the amount of time required for 50% of individuals to be in a sleep-like posture was larger during the photophase than during the scotophase for the diurnal *Ae. aegypti*, in contrast to the nocturnal *Cx. pipiens* and *An. stephensi*. The time required by 50% of individuals to reach a sleep-like state informed our subsequent experiments to minimize the risk of overestimating sleep in the species studied here.

Of importance is that in *Cx. pipiens* and *Ae. aegypti*, there is a reduction in response to host cues, indicated by a reduction in flight activity triggered by the presence of an experimenter, for individuals in prolonged resting/sleep state (Table 1). This provides evidence that the sleep states are likely correlated with an increased arousal threshold. Overall, these results indicate that there are distinct postures associated with putative sleep-like states in mosquitoes, that individuals will enter these postural states more rapidly during the circadian period associated with lower activity, and that these states correlate with increased arousal thresholds in both diurnal and nocturnal species.

### Circadian timing and sleep-like period differ among multiple mosquito species

One important hallmark of sleep is that organisms (studied so far) experience reversible prolonged periods of immobility/inactivity during a particular phase of the circadian day (Hendricks et al., 2000; Prober et al., 2006; Raizen et al., 2008; Shaw et al., 2000; Yokogawa et al., 2007). To determine periods of putative sleep (lack of activity) in mosquitoes, we quantified the rest–activity rhythm of all three mosquito species using an infrared-based activity monitoring system during a 24 h circadian day. In *Drosophila*-based studies, sleep is usually defined as a period of inactivity lasting for at least 5 min and the occurrence of rest (putative sleep) is inversely related to the number of activity counts (beam breaks) recorded per a given time (Hendricks et al., 2000; Huber et al., 2004; Shaw et al., 2000). This short period of 5 min is not appropriate for mosquitoes because this threshold would overestimate sleep duration in mosquitoes since they are less active than *Drosophila melanogaster* in the absence of host cues. Rather, we quantified the sleep profile for mosquitoes using a period of inactivity lasting 120 min based on the time required for 50% of mosquitoes to enter a sleep-like posture (Fig. 1C), which also represents a threshold beyond which there was a significant reduction in the arousal of mosquitoes to host cues (Table 1).

Based on historical observations of field-based mosquito feeding behavior, we hypothesized that *Ae. aegypti* – a diurnal mosquito ‘day biter’ (Rund et al., 2020; Tuchinda et al., 1969) – would have increased activity during the photophase (day time) and that rest (putative sleep) would be well consolidated in the scotophase (night time). Laboratory measurements in *Ae. aegypti* showed that activity increased from mid-day till the onset of light off, but activity reduced significantly throughout the night after light off (Fig. 2A). Putative sleep for *Ae. aegypti* decreased from mid-day till the end of the photophase, but putative sleep was well consolidated in the scotophase (Fig. 2D). As expected, the sleep bouts reported in the circadian day were the exact inverse to the flight activity profile.

Comparative analysis conducted in *Cx. pipiens* – a crepuscular–dark active species (Veronesi et al., 2012) – showed that activity was consistently low during the day but increased in

anticipation of light off (dusk) (Fig. 2B) and putative sleep was reduced significantly from dusk into the first half of the night (Fig. 2E). For the nocturnal mosquito ‘night biter’ (Rund et al., 2016), *An. stephensi* increased activity from early night into the mid-night, with activity reducing as day approached (Fig. 2C). Putative sleep occurred throughout the day for *An. stephensi* (Fig. 2F).

Sleep amount in minutes was quantified for our laboratory strains of mosquitoes, with comparisons made among the three species. Statistical analysis shows there was a significant difference in the mean total sleep (Kruskal–Wallis test:  $\chi^2=7.221$ , d.f.=2,  $P=0.027$ ), where the difference existed only between *Ae. aegypti* and *Cx. pipiens* (Dunn’s multiple comparison:  $P=0.027$ ; Fig. 2G). As expected, length of daytime and night-time sleep differed among the species (Kruskal–Wallis test: daytime,  $\chi^2=36.831$ , d.f.=2,  $P<0.001$ ; night-time,  $\chi^2=65.519$ , d.f.=2,  $P<0.001$ ; Fig. 2H); however, there was no difference between *Cx. pipiens* and *An. stephensi* for either day or night. Together, these results reveal the marked differences in timing and amount of sleep-like periods in different mosquito species.

### Sleep deprivation induces sleep rebound in *Aedes aegypti* and *Anopheles stephensi* depending on the phase of perturbation

Sleep deprivation in mosquitoes was assessed for subsequent sleep rebound when individuals are normally active. In *Ae. aegypti*, sleep deprivation by mechanical disturbance was conducted for 12 h during the night, 4 h during the night, and 12 h during the day. However, in *An. stephensi*, sleep deprivation was only done for 12 h during the day for comparative observations with the day-active *Ae. aegypti*.

*Aedes aegypti* mosquitoes subjected to vibration pulses (1 min of vibration followed by 5 min of rest) throughout the night recorded a significant sleep loss of about 558 min when we compared with sleep during the preceding night (Wilcoxon signed rank test:  $V=1122$ ,  $P<0.001$ ; Fig. S1E). This sleep loss promoted a significant rebound in the subsequent photophase, with a gain of approximately 76 min of sleep (paired  $t$ -test:  $t=3.463$ ,  $P=0.001$ ; Fig. 3A). A significant sleep loss of nearly 159 min occurred in *Ae. aegypti* mosquitoes that experienced vibration pulses (1 min of vibration followed by 1 min of rest) in the first 4 h of the night (Wilcoxon signed rank test:  $V=1672.500$ ,  $P<0.001$ ; Fig. S1F). Even this short amount of lost sleep early in the night was adequate to induce sleep rebound in the following day; a significant sleep gain of nearly 1 h was reported (paired  $t$ -test:  $t=3.846$ ,  $P<0.001$ ; Fig. 3B).

In the *Ae. aegypti* mosquitoes subjected to vibration pulses (1 min of vibration followed by 5 min of rest) during the photophase, the amount of sleep lost by comparing with sleep amount in the baseline day was approximately 436 min (Wilcoxon signed rank test:  $V=2013$ ,  $P<0.001$ ; Fig. S1G). However, this failed to yield a significant sleep gain in the subsequent night, indicating that sleep deprivation during a normally active period does not generate a rebound (paired  $t$ -test:  $t=0.378$ ,  $P=0.707$ ; Fig. 3C). This was not the case for *An. stephensi* mosquitoes, as daytime sleep deprivation in this species mirrored that of night-time sleep deprivation in *Ae. aegypti*, which was expected as this species is active at night. A significant sleep loss of about 594 min was reported (Wilcoxon signed rank test:  $V=666$ ,  $P<0.001$ ; Fig. S1H), which induced a significant sleep recovery in the subsequent scotophase (Wilcoxon signed rank test: sleep gain=196 min;  $V=73$ ,  $P<0.001$ ; Fig. 3D).

The influence of sleep deprivation in mosquitoes was also examined in relation to another sleep architecture, i.e. sleep bout duration. Results showed that sleep deprivation promoted a

**Table 1. Prolonged inactive, sleep-like periods reduce the responsiveness of mosquitoes to a potential host**

| Time inactive (min) | <i>Aedes aegypti</i>     | <i>Culex pipiens</i>     |
|---------------------|--------------------------|--------------------------|
| 0                   | 0.85±0.10 <sup>a</sup>   | 0.54±0.15 <sup>a</sup>   |
| 30                  | 0.82±0.12 <sup>a</sup>   | 0.44±0.17 <sup>a,b</sup> |
| 60                  | 0.67±0.14 <sup>a,b</sup> | 0.36±0.15 <sup>a,b</sup> |
| 120                 | 0.40±0.22 <sup>b</sup>   | 0.25±0.22 <sup>a,b</sup> |
| 240                 | 0.46±0.15 <sup>b</sup>   | 0.21±0.12 <sup>b</sup>   |

Data represent the proportion (means±s.e.m.) of aroused individuals within 30 s of exposure to an experimenter’s breath. Values with different letters within a column are significantly different based on ANOVA.

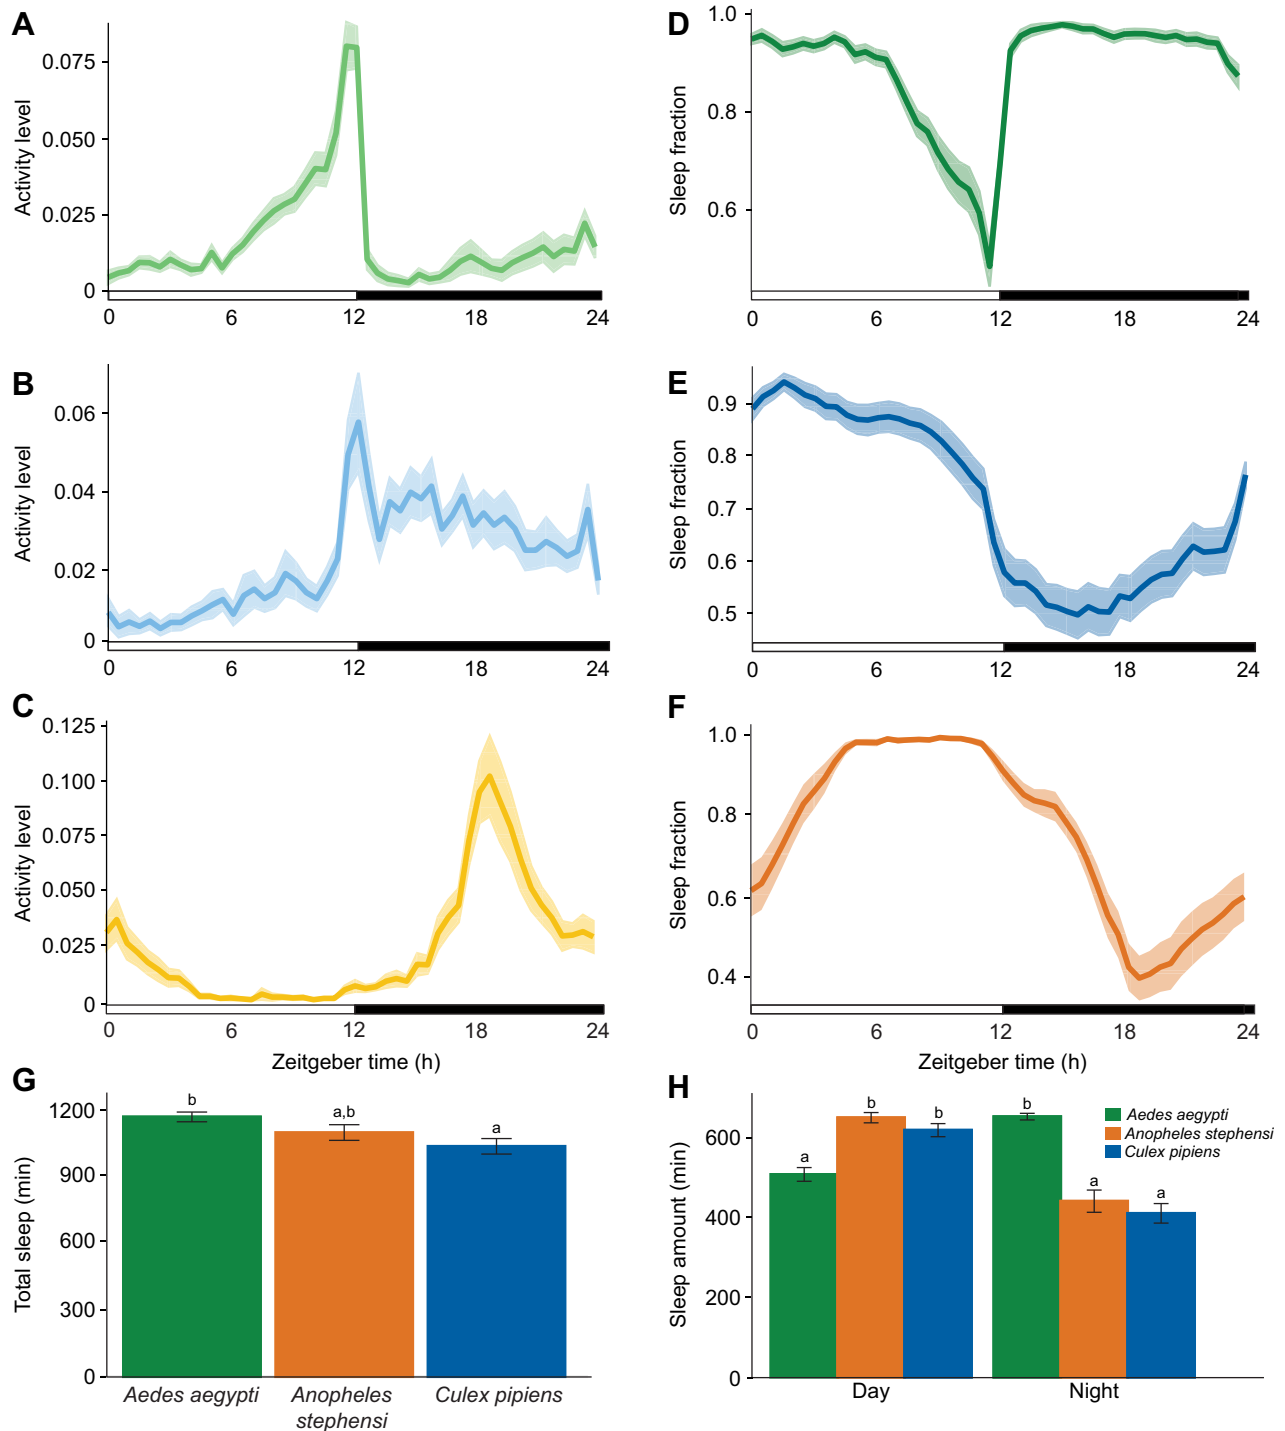

**Fig. 2. Timing and amount of sleep differ among multiple mosquito species.** Basic activity rhythm of (A) *Aedes aegypti*, (B) *Culex pipiens* and (C) *Anopheles stephensi* over a 24 h period. The y-axis represents the mean beam crosses in an activity monitor made by all the mosquitoes. Sleep profile of (D) *Ae. aegypti*, (E) *Cx. pipiens* and (F) *An. stephensi* averaged into a single 24 h period. The y-axis shows the proportion of time spent sleeping (defined as inactive periods of 120 min), averaged for each mosquito within a 30 min time window. The x-axis for all the plots represents the Zeitgeber time (ZT0–ZT24). The solid lines and the shaded areas display means and their 95% bootstrap confidence interval, respectively. White and black horizontal bars represent the photophase and scotophase, respectively. Comparison of (G) total sleep and (H) daytime and night-time sleep among the three mosquito species. Error bars denote s.e.m. sleep amount. Different letters indicate significant differences between treatment groups (Kruskal–Wallis test with Dunn’s multiple comparison *post hoc*,  $P < 0.05$ ). In all the analyses,  $n = 60$  for both *Ae. aegypti* and *Cx. pipiens* and  $n = 34$  for *An. stephensi*.

significantly increased sleep bout duration in the subsequent light phase for both the 12 h night-time (Wilcoxon signed rank test:  $V = 994$ ,  $P < 0.001$ ; Fig. 3E) and 4 h night-time deprivations in *Ae. aegypti* (Wilcoxon signed rank test:  $V = 1364$ ,  $P < 0.001$ ; Fig. 3F).

As expected, daytime sleep deprivation in *Ae. aegypti* did not significantly impact sleep bout duration in the subsequent night (paired *t*-test:  $t = 0.481$ ,  $P = 0.633$ ; Fig. 3G and Fig. S11). Although, daytime sleep deprivation in *An. stephensi* significantly promoted

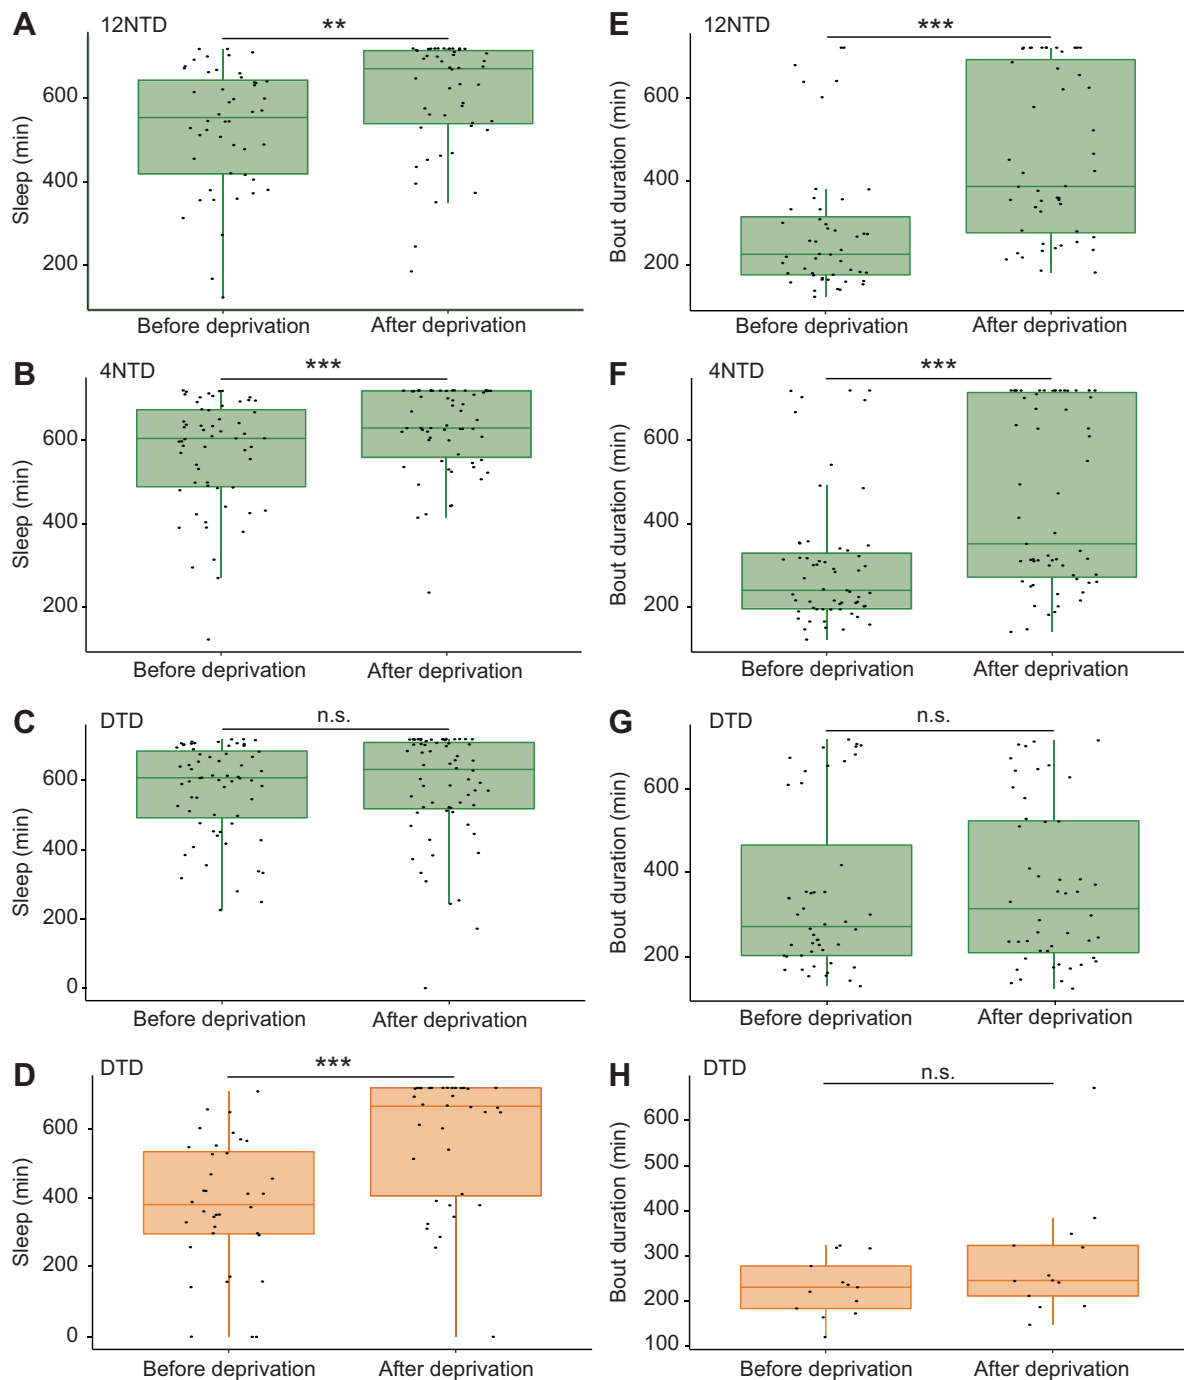

**Fig. 3. Sleep deprivation induces sleep rebound in both *Aedes aegypti* and *Anopheles stephensi*.** Comparison of sleep amounts in the phase of interest before and after sleep deprivation in (A) 12 h night-time sleep deprivation (12NTD) experiment in *Ae. aegypti* ( $n=48$ ), (B) 4 h night-time sleep deprivation (4NTD) experiment in *Ae. aegypti* ( $n=59$ ), (C) 12 h daytime sleep deprivation (DTD) experiment in *Ae. aegypti* ( $n=64$ ) and (D) 12 h daytime sleep deprivation (DTD) experiment in *An. stephensi* ( $n=36$ ). Comparison of average bout durations in the phase of interest before and after sleep deprivation in (E) 12 h nighttime sleep deprivation (12NTD) experiment in *Ae. aegypti* ( $n=48$ ), (F) 4 h night-time sleep deprivation (4NTD) experiment in *Ae. aegypti* ( $n=59$ ), (G) 12 h daytime sleep deprivation (DTD) experiment in *Ae. aegypti* ( $n=48$ , individuals with zero values excluded) and (H) 12 h daytime sleep deprivation (DTD) experiment in *An. stephensi* ( $n=13$ , individuals with zero values excluded). Test of significant difference between groups was carried out using paired *t*-test or Wilcoxon signed rank test where applicable (n.s.=not significant, \*\* $P<0.01$ , \*\*\* $P<0.001$ ).

sleep gain in the subsequent night, sleep bout duration was not significantly affected (Wilcoxon signed rank test:  $V=64$ ,  $P=0.216$ ; Fig. 3H and Fig. S1J). From our results, mosquitoes deprived of sleep during the normal periods of low activity, experience sleep rebound in the subsequent phase, but there was no sleep recovery if sleep deprivation occurs during their normally active period.

### Sleep deprivation in *Aedes aegypti* suppresses host landing in both laboratory and field settings, and impairs blood-feeding propensity

The impact of sleep deprivation on host landing in *Ae. aegypti* both in laboratory and field mesocosm experiments was assessed to establish a specific role in relation to interactions with potential

hosts. In specific, the number of mosquitoes that landed on an artificial host 4 h after a long-night sleep deprivation was assessed at different time points. In the laboratory assay, the proportion of mosquitoes that landed was lower in the sleep-deprived group when compared with the control at all time points (Fig. 4A and Movie 1). Similar results were also observed in the field, with a lesser proportion of mosquitoes landing on the artificial host at all time points in the sleep-deprived group in comparison with the control counterparts (Fig. 4B).

A general linear model assessing host landing status ('landed' and 'not landed') relative to treatment (sleep deprived and control) was utilized to examine for significance. Host landing was significantly explained by sleep deprivation in the lab-based assay ( $P < 0.001$  for all time points; Fig. 4A). In the field-based studies (Fig. 4B), no significance was noted at 5 min ( $P = 0.199$ ) but variation in host landing was significantly explained by sleep deprivation at 10 min ( $P = 0.002$ ) and 15 min ( $P < 0.001$ ).

In addition, we evaluated the effect of sleep deprivation on blood-feeding propensity, as a proxy for vectorial capacity. This was done by quantifying the number of mosquitoes that blood fed on a volunteer host, 4 h after a 12 h night-time sleep deprivation. Results show that sleep deprivation impairs blood-feeding propensity, with a significantly lesser proportion of mosquitoes able to blood feed in the sleep-deprived group (~54% reduction) during 5 min of exposure to host in comparison with control (Wilcoxon rank sum test:  $W = 58.5$ ,  $P < 0.01$ ; Fig. 4C). However, there was a recovery of blood-feeding propensity in the sleep-deprived group after a long period of host exposure (30 min of host availability, data not shown).

Overall, host landing is significantly suppressed by sleep deprivation in both lab and field conditions, and sleep deprivation induced a reduction in blood feeding during the periods when *Ae. aegypti* females are typically active.

## DISCUSSION

Our studies establish the occurrence of sleep-like states in mosquitoes including *Ae. aegypti*, *Cx. pipiens* and *An. stephensi* based on some of the conventional behavioral features described in other insect systems. These consist of a consolidated period of inactivity/immobility in a particular phase of the circadian day, postural differences between active (awake) state and putative sleep state, and the occurrence of sleep recovery following sleep disruption. Lastly, the influence of sleep deprivation on mosquito biology and their role in disease transmission was established by identifying that a reduced arousal while in sleep states when a host is present and host landing and blood feeding patterns can be altered by sleep deprivation.

Sleeping arthropods assume obvious sleep postures. For example, antennal positions are associated with sleep in *A. mellifera*, where the scapes are positioned almost horizontally close to the head surface, and the pedicels with their flagella assume a vertical position during the night, which are different during locomotor activity in the subjective day (Kaiser, 1988). In the same insect system, small swaying movements of the antennae are associated with the resting state (Kaiser, 1988). In the nocturnal cockroach, *Blaberus giganteus*, raised body posture and antennal movements are predominant in the dark period, while rest during the day is associated with the body and the antennae touching the substrate (Tobler and Neuner-Jehle, 1992). In *D. melanogaster*, individual flies move away from their food source and take up a prone position prior to resting (Hendricks et al., 2000). Respiratory abdominal pumping and small sporadic proboscis extension/retraction are the

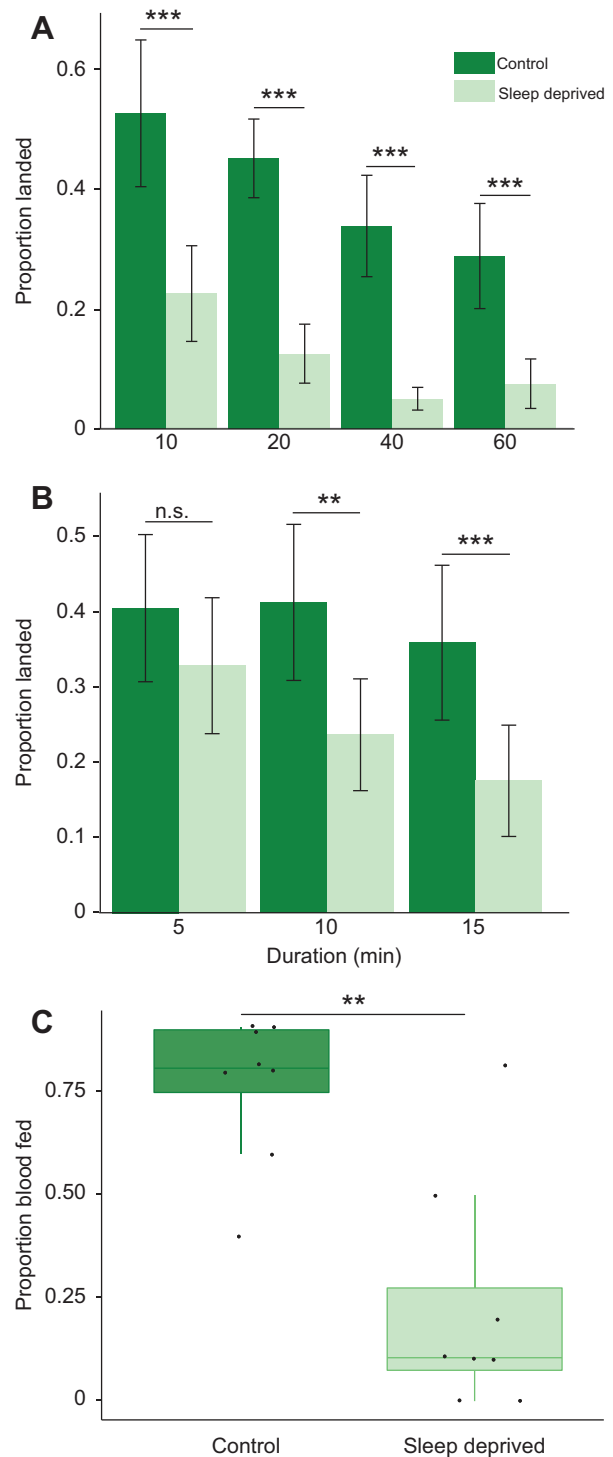

**Fig. 4. Host landing and blood-feeding propensity are impaired by sleep deprivation in *Aedes aegypti*.** Mean proportion of *Ae. aegypti* mosquitoes that landed on the artificial host at different time points following sleep deprivation during the subsequent photophase in (A) laboratory assay ( $n = 8$  tests of 10 mosquitoes each) and (B) field mesocosm experiment ( $n = 13$  tests of 10 mosquitoes each). (C) Proportion of *Ae. aegypti* mosquitoes that blood fed during the subsequent photophase after sleep deprivation ( $n = 8$  tests of 10 mosquitoes each). Error bars denote s.e.m. proportion of mosquitoes that landed on the artificial host. A general linear model and Wilcoxon rank sum test were used to assess significant differences in host landing and blood feeding between the treatment groups, respectively (n.s., not significant,  $**P < 0.01$ ,  $***P < 0.001$ ).



only movements that occur during the sleep-like state in these flies (Hendricks et al., 2000). Evidence for postural differences between active and sleep-like states in mosquitoes was successfully established in our study for three mosquito species, with whole body orientation and most importantly hind leg angle providing significant distinctions between these states. This is the first study in insects where the orientation of the insect leg is a feature distinguishing sleep-like condition from the active state. Interestingly, a subtle difference was seen between the culicine species (*Ae. aegypti* and *Cx. pipiens*) and the anopheline species (*An. stephensi*). In the latter species, leg angle was not strong enough to show conspicuous difference between the active and sleep-like states. Unlike in the culicines, during non-flight activity, adult *Anopheles* mosquito typically has its abdomen pointing away from the substrate, thereby forming an angle of 30–45 deg with the substrate (or resting surface) (Becker et al., 2010). Legs of anophelines are generally longer than those of culicines (Becker et al., 2010); this might explain the weak difference between active and sleep-like states based only on leg orientation.

Historical observations of biting/feeding and resting behavior in the field have shown that these occur at different periods of the day in mosquito species, being modulated by circadian rhythms (Guelbéogo et al., 2018; Rund et al., 2013). *Aedes* mosquitoes are active and feed mostly during the day, whereas *Cx. pipiens* and *An. stephensi* have increased feeding activity during the twilight and night, respectively; these differences in feeding and resting time matched our laboratory observations in this study (Rund et al., 2016; Tuchinda et al., 1969; Veronesi et al., 2012). Furthermore, the reduction in arousal when in the sleep states we observed in *Ae. aegypti* and *Cx. pipiens* could be a contributing factor in why these mosquitoes do not feed, even when a host is present, during the night and day, respectively. In *Drosophila*-based studies where the flies were subjected to 12 h:12 h photophase:scotophase, prolonged periods of rest were observed in the dark period, similar to what we observed in *Ae. aegypti* (Andreatic and Shaw, 2005; Huber et al., 2004; Shaw et al., 2000). The most significant difference between those studies and this current one is the duration of immobility used to establish sleep. While a 5 min period of inactivity is sufficient to define sleep in *Drosophila*, a period of no activity for at least 120 min was used in our study for mosquitoes, based on postural and arousal observations. The strong preference for rest in the photophase for *An. stephensi* and *Cx. pipiens* is similar to what was reported in two cockroach species, *Leucophaea maderae* and *B. giganteus* (Tobler, 1983; Tobler and Neuner-Jehle, 1992). Furthermore, the difference in circadian timing of sleep-like states (low activity) observed among the different mosquito species in this study is not surprising, as there are reports in other studies of differences in several aspects of activity/rest rhythm among closely related species, but these studies are limited to a few comparisons in fruit flies and wasps (Bertossa et al., 2013; Prabhakaran and Sheeba, 2012). Sleep rebound is an important hallmark of sleep, where there is an increase in sleep following sleep disruption in the phase during which an individual normally sleeps, i.e. a homeostatic regulation of sleep (Keene and Duboue, 2018). This phenomenon has been confirmed in different arthropods, including scorpions (Tobler and Stalder, 1988), cockroaches (Tobler, 1983; Tobler and Neuner-Jehle, 1992), honey bees (Sauer et al., 2004) and fruit flies (Hendricks et al., 2000; Shaw et al., 2000), and also in other non-arthropod systems (Kanaya et al., 2020; Nath et al., 2017; Raizen et al., 2008). In the present study, we observed an increase in sleep amount in the subsequent phase as a result of night-time and daytime sleep deprivation in *Ae. aegypti* and *An. stephensi*,

respectively. As expected, daytime sleep deprivation did not induce sleep rebound in *Ae. aegypti*, similar to the result for daytime sleep deprivation in a *Drosophila*-based study (Shaw et al., 2000). This indicates a compensatory increase in sleep following night-time sleep deprivation in *Ae. aegypti* was not driven by increased activity but by sleep loss.

Sleep deprivation impacts a diverse range of biological processes in animals including cognition, metabolism, alertness, reproduction and immunity (Foster and Wulff, 2005; Potdar et al., 2018). In honey bees, foraging efficiency of nestmates is affected because of the negative effect of sleep deprivation on waggle dance signaling (Klein et al., 2010). Short- and long-term memory are both disrupted by night-time sleep deprivation in *Drosophila* (Seugnet et al., 2008, 2011), but adequate sleep tends to facilitate memory and learning improvement (Dissel et al., 2015; Donlea et al., 2011). In another study, sleep deprivation in *Drosophila* was reported to suppress aggressive behaviors, with a serious impact on reproductive fitness (Kayser et al., 2015). Importantly, a strong link between sleep and immune function has been established in *Drosophila* (Toda et al., 2019), and studies have shown that reduced sleep leads to increased resistance to bacterial infection and a major category of genes that increased expression owing to sleep deprivation is involved in immune function (Kuo and Williams, 2014; Williams et al., 2007). These results are particularly interesting for our study system because circadian rhythms modulate immune response (Murdock et al., 2013), and immunity is one of the main factors that influence disease transmission in mosquitoes (Rund et al., 2011). Although our study was mainly behavioral elucidation of sleep and we did not consider the influence of sleep deprivation on immune response, we were able to show the potential effect of sleep disruption on mosquitoes' vectorial capacity by measuring host landing, blood-feeding propensity and arousal when a host is present, which is critical to obtain a blood meal and transmit pathogens (Garrett-Jones and Shidrawi, 1969). Laboratory and field mesocosm experiments revealed that *Ae. aegypti* mosquitoes had a significantly reduced response to a host mimic after night-time sleep deprivation. Our field-based studies took place in an area where mechanical and host disturbances are likely to occur and that represents a typical area near residential buildings in the USA. Based on studies in other systems, sleep-deprived *Ae. aegypti* sleep more during the day to recover their lost sleep from the previous night, thereby displaying an increased arousal threshold to host stimulation: an important hallmark of sleep (Keene and Duboue, 2018). The successful transmission of diseases by mosquitoes is heavily reliant on a pathogen-carrying mosquito encountering a host at a specific time that matches, and eventually introducing the infective stage of the pathogen to the host during feeding (Dye, 1986). We predict that sleep deprivation will affect disease transmission, since blood-feeding propensity was also significantly impaired in our study. Furthermore, the acquisition of a specific pathogen requires the vector feeds at a specific time when stages are present in the blood that can establish within the vector (Benoit and Vinauger, 2022; Westwood et al., 2019). Hence, altered host landing and blood feeding in mosquitoes due to sleep deprivation could change the dynamics between host, pathogens, and disease vector. These interacting aspects indicate there is an urgent need to investigate the influence of sleep deprivation on other components of vectorial capacity as this would improve current disease modeling and vector control strategies. One limitation of this study is our focus on the first gonotrophic cycle in order to have good experimental control over the physiological state of the test

mosquitoes, but future research is still required to investigate the effects of gonotrophic cycles on the biological rhythms and sleep duration of mosquitoes.

#### Acknowledgements

We thank Diane Eilerts for fruitful discussions about the project, and Zhijian Jake Tu for providing females of the Indian strain of *Anopheles stephensi*, a representative of the type form. The following reagent was obtained through BEI Resources, NIAID, NIH: *Aedes aegypti*, Strain LVP-IB12, Eggs, MRA-735, contributed by David W. Severson.

#### Competing interests

The authors declare no competing or financial interests.

#### Author contributions

Conceptualization: O.M.A., C.V., J.B.B.; Methodology: O.M.A., J.M.M., L.A.G., E.S.S., B.D.P., J.A.K., C.V., J.B.B.; Formal analysis: O.M.A., C.V., J.B.B.; Data curation: O.M.A., J.M.M., L.A.G., E.S.S., B.D.P., J.A.K., C.V., J.B.B.; Writing - original draft: O.M.A., C.V.; Writing - review & editing: O.M.A., J.M.M., L.A.G., E.S.S., B.D.P., J.A.K., C.V., J.B.B.; Visualization: O.M.A., C.V., J.B.B.; Project administration: J.B.B.; Funding acquisition: O.M.A., C.V., J.B.B.

#### Funding

Research reported in this publication was partially supported by the National Institute of Allergy and Infectious Diseases of the National Institutes of Health (R01AI148551 to J.B.B. for shared incubator space), University of Cincinnati Sigma Xi (to O.M.A.), the National Institute of Food and Agriculture of the United States Department of Agriculture (Hatch project 1017860 to C.V.), and partially supported by the National Institute of Allergy and Infectious Diseases of the National Institutes of Health (R01AI155785 to C.V.). Deposited in PMC for release after 12 months.

#### Data availability

Data generated from this study are available from the Dryad digital repository (Benoit et al., 2022): doi:10.5061/dryad.41ns1rnh5

#### References

- Ajayi, O. M., Eilerts, D. F., Bailey, S. T., Vinauger, C. and Benoit, J. B. (2020). Do Mosquitoes Sleep? *Trends Parasitol.* **36**, 888–897. doi:10.1016/j.pt.2020.08.004
- Andretic, R. and Shaw, P. J. (2005). Essentials of sleep recordings in *Drosophila*: moving beyond sleep time. *Methods Enzymol.* **393**, 759–772. doi:10.1016/S0076-6879(05)93040-1
- Barnard, D. R., Knue, G. J., Dickerson, C. Z., Bernier, U. R. and Kline, D. L. (2011). Relationship between mosquito (Diptera: Culicidae) landing rates on a human subject and numbers captured using CO<sub>2</sub>-baited light traps. *Bull. Entomol. Res.* **101**, 277–285. doi:10.1017/S0007485310000453
- Becker, N., Petric, D., Zgomba, M., Boase, C., Minoo, M., Dahl, C. and Kaiser, A. (2010). *Mosquitoes and Their Control*. Springer.
- Benoit, J. B. and Vinauger, C. (2022). Chronobiology of blood feeding arthropods: influences of their role as disease vectors. In *Sensory Ecology of Disease Vectors* (ed. S. Hill, R. I. and M. Lorenzo). Wageningen: Academic Publishers (in press).
- Benoit, J., Ajayi, O. M., Mariman, J. M., Gleitz, L. A., Smith, E. S., Piller, B. D., Krupa, J. A. and Vinauger, C. (2022). Behavioral and postural analyses establish sleep-like states for mosquitoes that can impact host landing and blood feeding. *Dryad, Dataset*, doi:10.5061/dryad.41ns1rnh5
- Bertossa, R. C., van Dijk, J., Diao, W., Saunders, D., Beukeboom, L. W. and Beersma, D. G. M. (2013). Circadian rhythms differ between sexes and closely related species of *Nasonia* wasps. *PLoS One* **8**, e60167. doi:10.1371/journal.pone.0060167
- Campbell, S. S. and Tobler, I. (1984). Animal sleep: a review of sleep duration across phylogeny. *Neurosci. Biobehav. Rev.* **8**, 269–300. doi:10.1016/0149-7634(84)90054-X
- Deboer, T. (2013). Behavioral and electrophysiological correlates of sleep and sleep homeostasis. In *Sleep, Neuronal Plasticity and Brain Function* (ed. P. Meerlo, R. M. Benca and T. Abel), pp. 1–24. Springer.
- Dissel, S., Angadi, V., Kirszenblat, L., Suzuki, Y., Donlea, J., Klose, M., Koch, Z., English, D., Winsky-Sommerer, R., van Swinderen, B. et al. (2015). Sleep restores behavioral plasticity to *Drosophila* mutants. *Curr. Biol.* **25**, 1270–1281. doi:10.1016/j.cub.2015.03.027
- Donlea, J. M., Thimgan, M. S., Suzuki, Y., Gottschalk, L., Shaw, P. J. (2011). Inducing sleep by remote control facilitates memory consolidation in *Drosophila*. *Science* **332**, 1571–1576. doi:10.1126/science.1202249
- Drummond, S. P. A., Brown, G. G., Christian Gillin, J., Stricker, J. L., Wong, E. C. and Buxton, R. B. (2000). Altered brain response to verbal learning following sleep deprivation. *Nature* **403**, 655–657. doi:10.1038/35001068
- Dye, C. (1986). Vectorial capacity: must we measure all its components? *Parasitol. Today* **2**, 203–209. doi:10.1016/0169-4758(86)90082-7
- Eban-Rothschild, A. D. and Bloch, G. (2008). Differences in the sleep architecture of forager and young honeybees (*Apis mellifera*). *J. Exp. Biol.* **211**, 2408–2416. doi:10.1242/jeb.016915
- Foster, R. G. and Wulff, K. (2005). The rhythm of rest and excess. *Nat. Rev. Neurosci.* **6**, 407–414. doi:10.1038/nrn1670
- Garrett-Jones, C. and Shidrawi, G. R. (1969). Malaria vectorial capacity of a population of *Anopheles gambiae*: an exercise in epidemiological entomology. *Bull. World Health Organ* **40**, 531–545.
- Geissmann, Q., Rodriguez, L. G., Beckwith, E. J. and Gilestro, G. F. (2019). Rethomics: An R framework to analyse high-throughput behavioural data. *PLoS One* **14**, e0209331. doi:10.1371/journal.pone.0209331
- Guelbéogo, W. M., Gonçalves, B. P., Grignard, L., Bradley, J., Serme, S. S., Hellewell, J., Lanke, K., Zongo, S., Sepúlveda, N., Soulama, I. et al. (2018). Variation in natural exposure to *Anopheles* mosquitoes and its effects on malaria transmission. *Elife* **7**, e32625. doi:10.7554/eLife.32625
- Hagan, R. W., Didion, E. M., Rossetol, A. E., Holmes, C. J., Siler, S. C., Rosendale, A. J., Hendershot, J. M., Elliot, K. S. B., Jennings, E. C., Nine, G. A. et al. (2018). Dehydration prompts increased activity and blood feeding by mosquitoes. *Sci. Rep.* **8**, 1–12. doi:10.1038/s41598-018-24893-z
- Harrison, Y. and Horne, J. A. (1999). One night of sleep loss impairs innovative thinking and flexible decision making. *Organ. Behav. Hum. Decis. Process* **78**, 128–145. doi:10.1006/obhd.1999.2827
- Haufe, W. O. (1963). Ethological and statistical aspects of a quantal response in mosquitoes to environmental stimuli. *Behaviour* **20**, 221–241. doi:10.1163/156853963X00013
- Helfrich-Förster, C. (2018). Sleep in insects. *Annu. Rev. Entomol.* **63**, 69–86. doi:10.1146/annurev-ento-020117-043201
- Hendricks, J. C., Finn, S. M., Panckeri, K. A., Chavkin, J., Williams, J. A., Sehgal, A. and Pack, A. I. (2000). Rest in *Drosophila* is a sleep-like state. *Neuron* **25**, 129–138. doi:10.1016/S0896-6273(00)80877-6
- Huber, R., Hill, S. L., Holladay, C., Biesiadecki, M., Tononi, G. and Cirelli, C. (2004). Sleep homeostasis in *Drosophila melanogaster*. *Sleep* **27**, 628–639. doi:10.1093/sleep/27.4.628
- Kaiser, W. (1988). Busy bees need rest, too. *J. Comp. Physiol. A* **163**, 565–584. doi:10.1007/BF00603841
- Kaiser, W. (1995). Rest at night in some solitary bees - a comparison with the sleep-like state of honey bees. *Apidologie* **26**, 213–230. doi:10.1051/apido:19950304
- Kanaya, H. J., Park, S., Kim, J.-H., Kusumi, J., Krenenou, S., Sawatari, E., Sato, A., Lee, J., Bang, H., Kobayakawa, Y. et al. (2020). A sleep-like state in *Hydra* unravels conserved sleep mechanisms during the evolutionary development of the central nervous system. *Sci. Adv.* **6**, abb9415. doi:10.1126/sciadv.abb9415
- Kashiwagi, M. and Hayashi, Y. (2020). The existence of two states of sleep as a common trait in various animals and its molecular and neuronal mechanisms. *Curr. Opin. Physiol.* **15**, 197–202. doi:10.1016/j.cophys.2020.03.007
- Kayser, M. S., Mainwaring, B., Yue, Z. and Sehgal, A. (2015). Sleep deprivation suppresses aggression in *Drosophila*. *Elife* **4**, e07643. doi:10.7554/eLife.07643
- Keenan, S. and Hirshkowitz, M. (2010). Monitoring and staging human sleep. In *Principles and Practice of Sleep Medicine* (ed. M. Kryger, T. Roth and W. Dement), pp. 1602–1609. Amsterdam: Elsevier.
- Keene, A. C. and Duboue, E. R. (2018). The origins and evolution of sleep. *J. Exp. Biol.* **221**, jeb159533. doi:10.1242/jeb.159533
- Klein, B. A., Klein, A., Wray, M. K., Mueller, U. G. and Seeley, T. D. (2010). Sleep deprivation impairs precision of waggle dance signaling in honey bees. *Proc. Natl. Acad. Sci. USA* **107**, 22705–22709. doi:10.1073/pnas.1009439108
- Kuo, T.-H. and Williams, J. A. (2014). Increased sleep promotes survival during a bacterial infection in *Drosophila*. *Sleep* **37**, 1077–1086, 1086A–1086D. doi:10.5665/sleep.3764
- Leming, M. T., Rund, S. S. C., Behura, S. K., Duffield, G. E. and O'Tousa, J. E. (2014). A database of circadian and diel rhythmic gene expression in the yellow fever mosquito *Aedes aegypti*. *BMC Genom* **15**, 1–9. doi:10.1186/1471-2164-15-1128
- Lima-Camara, T. N., Lima, J. B. P., Bruno, R. V. and Peixoto, A. A. (2014). Effects of insemination and blood-feeding on locomotor activity of *Aedes albopictus* and *Aedes aegypti* (Diptera: Culicidae) females under laboratory conditions. *Parasit. Vectors* **7**, 1–8. doi:10.1186/1756-3305-7-1
- Linsley, E. G. and Gorton Linsley, E. (1962). Sleeping aggregations of aculeate hymenoptera—II. *Ann. Entomol. Soc. Am.* **55**, 148–164. doi:10.1093/aesa/55.2.148
- Murdock, C. C., Moller-Jacobs, L. L. and Thomas, M. B. (2013). Complex environmental drivers of immunity and resistance in malaria mosquitoes. *Proc. Biol. Sci.* **280**, 20132030.
- Nath, R. D., Bedbrook, C. N., Abrams, M. J., Basinger, T., Bois, J. S., Prober, D. A., Sternberg, P. W., Gradinaru, V. and Goentoro, L. (2017). The jellyfish *Cassiopea* exhibits a sleep-like state. *Curr. Biol.* **27**, 2984–2990. doi:10.1016/j.cub.2017.08.014
- Potdar, S., Daniel, D. K., Thomas, F. A., Lall, S. and Sheeba, V. (2018). Sleep deprivation negatively impacts reproductive output in *Drosophila melanogaster*. *J. Exp. Biol.* **221**, jeb174771. doi:10.1242/jeb.174771

- Prabhakaran, P. M. and Sheeba, V.** (2012). Sympatric drosophilid species *melanogaster* and *ananassae* differ in temporal patterns of activity. *J. Biol. Rhythms* **27**, 365-376. doi:10.1177/0748730412458661
- Prather, A. A., Janicki-Deverts, D., Hall, M. H. and Cohen, S.** (2015). Behaviorally assessed sleep and susceptibility to the common cold. *Sleep* **38**, 1353-1359. doi:10.5665/sleep.4968
- Prober, D. A., Rihel, J., Onah, A. A., Sung, R.-J. and Schier, A. F.** (2006). Hypocretin/orexin overexpression induces an insomnia-like phenotype in Zebrafish. *J. Neurosci.* **26**, 13400-13410. doi:10.1523/JNEUROSCI.4332-06.2006
- Raccuglia, D., Huang, S., Ender, A., Heim, M.-M., Laber, D., Suárez-Grimalt, R., Liotta, A., Sigris, S. J., Geiger, J. R. P. and Oswald, D.** (2019). Network-specific synchronization of electrical slow-wave oscillations regulates sleep drive in *Drosophila*. *Curr. Biol.* **29**, 3611-3621.e3. doi:10.1016/j.cub.2019.08.070
- Raizen, D. M., Zimmerman, J. E., Maycock, M. H., Ta, U. D., You, Y.-J., Sundaram, M. V. and Pack, A. I.** (2008). Lethargus is a *Caenorhabditis elegans* sleep-like state. *Nature* **451**, 569-572. doi:10.1038/nature06535
- Ramón, F., Hernández-Falcón, J., Nguyen, B. and Bullock, T. H.** (2004). Slow wave sleep in crayfish. *Proc. Natl. Acad. Sci. USA* **101**, 11857-11861. doi:10.1073/pnas.0402015101
- Rechtschaffen, A. and Bergmann, B. M.** (2002). Sleep deprivation in the rat: an update of the 1989 paper. *Sleep* **25**, 18-24. doi:10.1093/sleep/25.1.18
- Rosendale, A. J., Dunlevy, M. E., McCue, M. D. and Benoit, J. B.** (2019). Progressive behavioural, physiological and transcriptomic shifts over the course of prolonged starvation in ticks. *Mol. Ecol.* **28**, 49-65. doi:10.1111/mec.14949
- Rund, S. S. C., Hou, T. Y., Ward, S. M., Collins, F. H. and Duffield, G. E.** (2011). Genome-wide profiling of diel and circadian gene expression in the malaria vector *Anopheles gambiae*. *Proc. Natl. Acad. Sci. USA* **108**, E421-E430. doi:10.1073/pnas.1014076108
- Rund, S. S. C., Lee, S. J., Bush, B. R. and Duffield, G. E.** (2012). Strain- and sex-specific differences in daily flight activity and the circadian clock of *Anopheles gambiae* mosquitoes. *J. Insect Physiol.* **58**, 1609-1619. doi:10.1016/j.jinsphys.2012.09.016
- Rund, S. S. C., Bonar, N. A., Champion, M. M., Ghazi, J. P., Houk, C. M., Leming, M. T., Syed, Z. and Duffield, G. E.** (2013). Daily rhythms in antennal protein and olfactory sensitivity in the malaria mosquito *Anopheles gambiae*. *Sci. Rep.* **3**, 2494. doi:10.1038/srep02494
- Rund, S. S. C., O'Donnell, A. J., Gentile, J. E. and Reece, S. E.** (2016). Daily rhythms in mosquitoes and their consequences for malaria transmission. *Insects* **7**, 14. doi:10.3390/insects7020014
- Rund, S. S. C., Labb, L. F., Benefiel, O. M. and Duffield, G. E.** (2020). Artificial light at night increases *Aedes aegypti* mosquito biting behavior with implications for arboviral disease transmission. *Am. J. Trop. Med. Hyg.* **103**, 2450-2452. doi:10.4269/ajtmh.20-0885
- Sauer, S., Herrmann, E. and Kaiser, W.** (2004). Sleep deprivation in honey bees. *J. Sleep Res.* **13**, 145-152. doi:10.1111/j.1365-2869.2004.00393.x
- Schmidt, M. H.** (2014). The energy allocation function of sleep: a unifying theory of sleep, torpor, and continuous wakefulness. *Neurosci. Biobehav. Rev.* **47**, 122-153. doi:10.1016/j.neubiorev.2014.08.001
- Seugnet, L., Suzuki, Y., Vine, L., Gottschalk, L. and Shaw, P. J.** (2008). D1 receptor activation in the mushroom bodies rescues sleep-loss-induced learning impairments in *Drosophila*. *Curr. Biol.* **18**, 1110-1117. doi:10.1016/j.cub.2008.07.028
- Seugnet, L., Suzuki, Y., Donlea, J. M., Gottschalk, L. and Shaw, P. J.** (2011). Sleep deprivation during early-adult development results in long-lasting learning deficits in adult *Drosophila*. *Sleep* **34**, 137-146. doi:10.1093/sleep/34.2.137
- Shaw, P. J., Cirelli, C., Greenspan, R. J. and Tononi, G.** (2000). Correlates of sleep and waking in *Drosophila melanogaster*. *Science* **287**, 1834-1837. doi:10.1126/science.287.5459.1834
- Tobler, I.** (1983). Effect of forced locomotion on the rest-activity cycle of the cockroach. *Behav. Brain Res.* **8**, 351-360. doi:10.1016/0166-4328(83)90180-8
- Tobler, I. and Neuner-Jehle, M.** (1992). 24-h variation of vigilance in the cockroach *Blaberus giganteus*. *J. Sleep Res.* **1**, 231-239. doi:10.1111/j.1365-2869.1992.tb00044.x
- Tobler, I. and Stalder, J.** (1988). Rest in the scorpion - a sleep-like state? *J. Comp. Physiol. A* **163**, 227-235. doi:10.1007/BF00612431
- Toda, H., Williams, J. A., Gullledge, M. and Sehgal, A.** (2019). A sleep-inducing gene, *nemuri*, links sleep and immune function in *Drosophila*. *Science* **363**, 509-515. doi:10.1126/science.aat1650
- Tuchinda, P., Kitaoka, M., Ogata, T. and Kurihara, T.** (1969). On the diurnal rhythm of biting behavior of *Aedes aegypti* in relation to the age and to the hemorrhagic fever in Bangkok, 1964. *Jpn. J. Trop. Med.* **10**, 1-6. doi:10.2149/jtmh1969.10.1
- van Alphen, B., Yap, M. H. W., Kirszenblat, L., Kottler, B. and van Swinderen, B.** (2013). A dynamic deep sleep stage in *Drosophila*. *J. Neurosci.* **33**, 6917-6927. doi:10.1523/JNEUROSCI.0061-13.2013
- van Alphen, B., Semenza, E. R., Yap, M., van Swinderen, B. and Allada, R.** (2021). A deep sleep stage in *Drosophila* with a functional role in waste clearance. *Sci. Adv.* **7**, eabc2999. doi:10.1126/sciadv.abc2999
- Veronesi, R., Gentile, G., Carrieri, M., Maccagnani, B., Stermieri, L. and Bellini, R.** (2012). Seasonal pattern of daily activity of *Aedes caspius*, *Aedes detritus*, *Culex modestus*, and *Culex pipiens* in the Po Delta of northern Italy and significance for vector-borne disease risk assessment. *J. Vector Ecol.* **37**, 49-61. doi:10.1111/j.1948-7134.2012.00199.x
- Waters, F., Chiu, V., Atkinson, A. and Blom, J. D.** (2018). Severe sleep deprivation causes hallucinations and a gradual progression toward psychosis with increasing time awake. *Front. Psychiatry* **9**, 303. doi:10.3389/fpsy.2018.00303
- Westwood, M. L., O'Donnell, A. J., de Bekker, C., Lively, C. M., Zuk, M. and Reece, S. E.** (2019). The evolutionary ecology of circadian rhythms in infection. *Nat. Ecol. Evol.* **3**, 552-560. doi:10.1038/s41559-019-0831-4
- Williams, J. A., Sathyanarayanan, S., Hendricks, J. C. and Sehgal, A.** (2007). Interaction between sleep and the immune response in *Drosophila*: a role for the NF- $\kappa$ B relish. *Sleep* **30**, 389-400. doi:10.1093/sleep/30.4.389
- Xie, L., Kang, H., Xu, Q., Chen, M. J., Liao, Y., Thiyagarajan, M., O'Donnell, J., Christensen, D. J., Nicholson, C., Iliff, J. J. et al.** (2013). Sleep drives metabolite clearance from the adult brain. *Science* **342**, 373-377. doi:10.1126/science.1241224
- Yokogawa, T., Marin, W., Faraco, J., Pézeron, G., Appelbaum, L., Zhang, J., Rosa, F., Mourrain, P. and Mignot, E.** (2007). Characterization of sleep in zebrafish and insomnia in hypocretin receptor mutants. *PLoS Biol.* **5**, e277. doi:10.1371/journal.pbio.0050277
